# Supplementary material for: Trends in Characteristics, Mortality, and Other Outcomes of Patients With Newly Diagnosed Cirrhosis
Source: PubMed Central journal article supplement (PMC6604080; doi:10.1001/jamanetworkopen.2019.6412), 2019-06-28

## Supplementary Online Content

Orman ES, Roberts A, Ghabril M, et al. Trends in characteristics, mortality, and other outcomes of patients with newly diagnosed cirrhosis. *JAMA Netw Open*. 2019;2(6):e196412. doi:10.1001/jamanetworkopen.2019.6412

**eTable 1.** Claims-Based Definitions

**eTable 2.** Incidence of Clinical Outcomes Based on Age

**eTable 3.** Cumulative Survival According to Baseline Decompensation Status, Age, and Cause of Cirrhosis

**eTable 4.** Incidence of Clinical Outcomes Based on Cause of Cirrhosis

**eFigure 1.** Mortality According to Age

**eFigure 2.** Mortality According to Cause of Cirrhosis

This supplementary material has been provided by the authors to give readers additional information about their work.

**eTable 1: Claims-Based Definitions**

|                                            | <b>ICD-9-CM</b>                                                                                                                                                                                        | <b>CPT</b>                                                                                                  | <b>Laboratory</b>   |
|--------------------------------------------|--------------------------------------------------------------------------------------------------------------------------------------------------------------------------------------------------------|-------------------------------------------------------------------------------------------------------------|---------------------|
| Alcoholic liver disease                    | 571.0; 571.1; 571.2;<br>571.3; 291.x; 303.x;<br>305.0x                                                                                                                                                 |                                                                                                             |                     |
| Any solid organ transplant                 | 00.91; 00.92; 00.93;<br>33.5; 33.50; 33.51;<br>33.52; 33.6; 37.5;<br>37.51; 46.97; 50.5;<br>50.51; 50.59; 52.8;<br>52.80; 52.81; 52.82;<br>52.83; 55.6; 55.61;<br>55.69; 996.8; V42;<br>V58.44; E878.0 | 32851; 32852;<br>32853; 32854;<br>33935; 33945;<br>44135; 44136;<br>47135; 47136;<br>48554; 50360;<br>50365 |                     |
| Ascites                                    | 789.59                                                                                                                                                                                                 |                                                                                                             |                     |
| Autoimmune hepatitis                       | 571.42                                                                                                                                                                                                 |                                                                                                             |                     |
| Cirrhosis                                  | 456.0; 456.1; 456.2;<br>456.21; 567.23; 571.2;<br>571.5; 572.2; 572.3;<br>572.4                                                                                                                        |                                                                                                             |                     |
| Dyslipidemia                               | 272.0; 272.1; 272.2;<br>272.4; 272.5; 272.9                                                                                                                                                            |                                                                                                             |                     |
| Hepatic encephalopathy                     | 572.2                                                                                                                                                                                                  |                                                                                                             |                     |
| Hepatitis B                                | 070.2; 070.20; 070.21;<br>070.22; 070.23;<br>070.30; 070.31;<br>070.32; 070.33                                                                                                                         |                                                                                                             | HBsAg               |
| Hepatitis C                                | 070.41; 070.44;<br>070.51; 070.54; 070.7;<br>070.70; 070.71                                                                                                                                            |                                                                                                             | Anti-HCV<br>HCV RNA |
| Hepatocellular carcinoma                   | 155.0                                                                                                                                                                                                  |                                                                                                             |                     |
| Hypertension                               | 401; 401.0; 401.1;<br>401.9; 402.0; 402.1;<br>402.9; 403.0; 403.1;<br>403.9; 404; 404.0;<br>404.1; 404.9; 278.0;<br>278.00; 278.01;<br>278.02; 278.1; V77.8;<br>783.1; 278.02                          |                                                                                                             |                     |
| Impaired fasting glucose/diabetes mellitus | 250; 790.2; 790.21;<br>790.22; 790.29                                                                                                                                                                  |                                                                                                             |                     |
| Liver transplant                           | 50.5; 50.51; 50.59                                                                                                                                                                                     | 47135; 47136                                                                                                |                     |
| Nonalcoholic steatohepatitis               | 571.8                                                                                                                                                                                                  |                                                                                                             |                     |
| Obesity                                    | 278.0; 278.00; 278.01;<br>278.1; V77                                                                                                                                                                   |                                                                                                             |                     |

|                                |               |              |  |
|--------------------------------|---------------|--------------|--|
| Paracentesis                   | 54.91         | 49080; 49081 |  |
| Primary biliary cholangitis    | 571.6         |              |  |
| Primary sclerosing cholangitis | 576.1         |              |  |
| Variceal hemorrhage            | 456.0; 456.20 |              |  |

Abbreviations: ICD-9-CM, International Classification of Diseases, Clinical Modification; CPT, Current Procedural Terminology; HBsAg, hepatitis B surface antigen; anti-HCV, hepatitis C antibody; HCV RNA, hepatitis C ribonucleic acid.

**eTable 2. Incidence of Clinical Outcomes Based on Age**

|                                           | Person-years | Events | Incidence rate <sup>a</sup><br>(95% CI) | Crude HR/SHR<br>(95% CI) | Adjusted HR/SHR <sup>b</sup><br>(95% CI) |
|-------------------------------------------|--------------|--------|-----------------------------------------|--------------------------|------------------------------------------|
| <b>Mortality</b>                          |              |        |                                         |                          |                                          |
| <40                                       | 1,975        | 126    | 6.4 (5.4-7.6)                           | 0.66 (0.55-0.79)         | 0.66 (0.55-0.80)                         |
| 40-64                                     | 19,435       | 1,924  | 9.9 (9.5-10.4)                          | Ref                      | Ref                                      |
| ≥65                                       | 6,037        | 976    | 16.2 (15.2-17.2)                        | 1.43 (1.33-1.55)         | 1.10 (0.98-1.23)                         |
| <b>Transplant</b>                         |              |        |                                         |                          |                                          |
| <40                                       | 1,975        | 6      | 0.3 (0.1-0.7)                           | 1.06 (0.46-2.45)         | 1.21 (0.52-2.82)                         |
| 40-64                                     | 19,435       | 61     | 0.3 (0.2-0.4)                           | Ref                      | Ref                                      |
| ≥65                                       | 6,037        | 21     | 0.3 (0.2-0.5)                           | 0.88 (0.54-1.44)         | 1.38 (0.67-2.83)                         |
| <b>Hepatocellular carcinoma</b>           |              |        |                                         |                          |                                          |
| <40                                       | 1,690        | 8      | 0.5 (0.2-0.9)                           | 0.27 (0.13-0.54)         | 0.36 (0.18-0.72)                         |
| 40-64                                     | 16,218       | 304    | 1.9 (1.7-2.1)                           | Ref                      | Ref                                      |
| ≥65                                       | 4,691        | 84     | 1.8 (1.4-2.2)                           | 0.84 (0.66-1.07)         | 1.58 (1.13-2.22)                         |
| <b>Decompensation<sup>c</sup></b>         |              |        |                                         |                          |                                          |
| <40                                       | 1,129        | 82     | 7.3 (5.9-9.0)                           | 0.75 (0.59-0.93)         | 0.78 (0.62-0.99)                         |
| 40-64                                     | 11,597       | 1,188  | 10.2 (9.7-10.8)                         | Ref                      | Ref                                      |
| ≥65                                       | 3,603        | 402    | 11.2 (10.1-12.3)                        | 0.92 (0.83-1.03)         | 1.08 (0.93-1.26)                         |
| <b>Ascites<sup>c</sup></b>                |              |        |                                         |                          |                                          |
| <40                                       | 1,180        | 68     | 5.8 (4.5-7.3)                           | 0.79 (0.62-1.01)         | 0.86 (0.67-1.10)                         |
| 40-64                                     | 12,245       | 950    | 7.8 (7.3-8.3)                           | Ref                      | Ref                                      |
| ≥65                                       | 3,745        | 318    | 8.5 (7.6-9.5)                           | 0.93 (0.82-1.06)         | 1.11 (0.93-1.33)                         |
| <b>Hepatic encephalopathy<sup>c</sup></b> |              |        |                                         |                          |                                          |
| <40                                       | 1,272        | 29     | 2.3 (1.6-3.3)                           | 0.55 (0.38-0.79)         | 0.53 (0.36-0.78)                         |
| 40-64                                     | 12,922       | 577    | 4.5 (4.1-4.8)                           | Ref                      | Ref                                      |
| ≥65                                       | 3,887        | 180    | 4.6 (4.0-5.4)                           | 0.88 (0.75-1.04)         | 1.19 (0.95-1.50)                         |
| <b>Variceal bleeding<sup>c</sup></b>      |              |        |                                         |                          |                                          |
| <40                                       | 1,262        | 19     | 1.5 (1.0-2.4)                           | 0.81 (0.51-1.29)         | 0.82 (0.50-1.33)                         |
| 40-64                                     | 13,131       | 267    | 2.0 (1.8-2.3)                           | Ref                      | Ref                                      |
| ≥65                                       | 3,990        | 56     | 1.4 (1.1-1.8)                           | 0.58 (0.44-0.78)         | 0.94 (0.64-1.37)                         |

<sup>a</sup>Per 100 person-years.

<sup>b</sup>Multivariable models were adjusted for sex, cause of cirrhosis, decompensation, Charlson comorbidity index, insurance, and year of cohort entry. For the mortality outcomes, hazard ratios (HR) are reported; for other outcomes, subhazard ratios (SHR) are reported.

<sup>c</sup>Decompensation outcomes were assessed in only those with compensated cirrhosis at baseline.

Abbreviations: HR, hazard ratio; SHR, subhazard ratio; CI, confidence interval.

**eTable 3: Cumulative Survival According to Baseline Decompensation Status, Age, and Cause of Cirrhosis**

|                               | <b>1-year survival<br/>(95% CI)</b> | <b>2-year survival<br/>(95% CI)</b> | <b>5-year survival<br/>(95% CI)</b> |
|-------------------------------|-------------------------------------|-------------------------------------|-------------------------------------|
| <b>Compensated</b>            |                                     |                                     |                                     |
| <40                           | 94.5 (91.5-96.5)                    | 92.8 (89.4-95.1)                    | 85.4 (80.1-89.4)                    |
| 40-64                         | 90.6 (89.6-91.4)                    | 84.7 (83.4-85.8)                    | 72.1 (70.4-73.8)                    |
| ≥65                           | 84.1 (82.2-85.8)                    | 75.9 (73.6-78.0)                    | 57.6 (54.5-60.6)                    |
| <b>Decompensated</b>          |                                     |                                     |                                     |
| <40                           | 73.1 (66.3-78.8)                    | 64.5 (57.0-71.1)                    | 55.6 (47.2-63.2)                    |
| 40-64                         | 65.1 (62.9-67.3)                    | 57.1 (54.7-59.5)                    | 41.7 (38.8-44.6)                    |
| ≥65                           | 62.6 (59.1-66.0)                    | 52.4 (48.4-56.2)                    | 34.1 (28.7-39.5)                    |
| <b>Compensated</b>            |                                     |                                     |                                     |
| <b>Alcohol</b>                | 91.4 (90.0-92.6)                    | 86.5 (84.7-88.0)                    | 73.9 (71.3-76.3)                    |
| <b>Viral</b>                  | 91.5 (90.3-92.5)                    | 85.2 (83.7-86.5)                    | 70.8 (68.7-72.9)                    |
| <b>NASH/other</b>             | 80.3 (78.0-82.3)                    | 71.7 (69.0-74.2)                    | 58.1 (54.7-61.3)                    |
| <b>Autoimmune/cholestatic</b> | 92.8 (87.7-95.9)                    | 88.2 (82.1-92.3)                    | 75.1 (65.7-82.3)                    |
| <b>Decompensated</b>          |                                     |                                     |                                     |
| <b>Alcohol</b>                | 73.1 (70.4-75.6)                    | 64.9 (61.8-67.7)                    | 51.1 (47.2-54.8)                    |
| <b>Viral</b>                  | 65.5 (62.3-68.6)                    | 55.5 (52.0-58.9)                    | 36.8 (32.8-40.9)                    |
| <b>NASH/other</b>             | 52.7 (48.9-56.3)                    | 46.2 (42.2-50.1)                    | 33.4 (28.6-38.3)                    |
| <b>Autoimmune/cholestatic</b> | 59.7 (45.2-71.6)                    | 38.7 (23.6-53.7)                    | 27.5 (12.1-45.5)                    |

Abbreviations: CI, confidence interval; NASH, nonalcoholic steatohepatitis.

**eTable 4: Incidence of Clinical Outcomes Based on Cause of Cirrhosis**

|                                           | Person-years | Events | Incidence rate <sup>a</sup><br>(95% CI) | Crude HR/SHR<br>(95% CI) | Adjusted HR/SHR <sup>b</sup><br>(95% CI) |
|-------------------------------------------|--------------|--------|-----------------------------------------|--------------------------|------------------------------------------|
| <b>Mortality</b>                          |              |        |                                         |                          |                                          |
| Alcohol                                   | 9,444        | 881    | 9.3 (8.7-10.0)                          | 0.94 (0.86-1.02)         | 0.89 (0.80-0.98)                         |
| Viral                                     | 12,565       | 1,198  | 9.5 (9.0-10.1)                          | Ref                      | Ref                                      |
| NASH/other                                | 4,722        | 879    | 18.6 (17.4-19.9)                        | 1.69 (1.55-1.85)         | 1.44 (1.30-1.60)                         |
| Autoimmune/cholestatic                    | 716          | 68     | 9.5 (7.5-12.1)                          | 0.94 (0.74-1.20)         | 1.01 (0.76-1.33)                         |
| <b>Transplant</b>                         |              |        |                                         |                          |                                          |
| Alcohol                                   | 9,444        | 35     | 0.4 (0.3-0.5)                           | 1.13 (0.72-1.79)         | 1.10 (0.66-1.82)                         |
| Viral                                     | 12,565       | 39     | 0.3 (0.2-0.4)                           | Ref                      | Ref                                      |
| NASH/other                                | 4,722        | 6      | 0.1 (0.1-0.3)                           | 0.29 (0.13-0.69)         | 0.32 (0.12-0.82)                         |
| Autoimmune/cholestatic                    | 716          | 8      | 1.1 (0.6-2.2)                           | 3.39 (1.58-7.26)         | 3.87 (1.72-8.70)                         |
| <b>Hepatocellular carcinoma</b>           |              |        |                                         |                          |                                          |
| Alcohol                                   | 7,881        | 76     | 1.0 (0.8-1.2)                           | 0.35 (0.27-0.45)         | 0.30 (0.23-0.41)                         |
| Viral                                     | 10,336       | 281    | 2.7 (2.4-3.1)                           | Ref                      | Ref                                      |
| NASH/other                                | 3,792        | 28     | 0.7 (0.5-1.1)                           | 0.25 (0.17-0.36)         | 0.22 (0.15-0.35)                         |
| Autoimmune/cholestatic                    | 590          | 11     | 1.9 (1.0-3.4)                           | 0.67 (0.37-1.24)         | 0.59 (0.29-1.19)                         |
| <b>Decompensation<sup>c</sup></b>         |              |        |                                         |                          |                                          |
| Alcohol                                   | 5,083        | 541    | 10.6 (9.8-11.6)                         | 0.92 (0.83-1.03)         | 0.97 (0.86-1.09)                         |
| Viral                                     | 7,776        | 891    | 11.5 (10.7-12.2)                        | Ref                      | Ref                                      |
| NASH/other                                | 2,970        | 195    | 6.6 (5.7-7.6)                           | 0.50 (0.43-0.59)         | 0.51 (0.43-0.60)                         |
| Autoimmune/cholestatic                    | 501          | 45     | 9.0 (6.7-12.0)                          | 0.77 (0.57-1.03)         | 0.82 (0.59-1.13)                         |
| <b>Ascites<sup>c</sup></b>                |              |        |                                         |                          |                                          |
| Alcohol                                   | 5,406        | 406    | 7.5 (6.8-8.3)                           | 0.83 (0.73-0.93)         | 0.86 (0.75-0.98)                         |
| Viral                                     | 8,236        | 744    | 9.0 (8.4-9.7)                           | Ref                      | Ref                                      |
| NASH/other                                | 3,010        | 150    | 5.0 (4.2-5.8)                           | 0.48 (0.40-0.57)         | 0.46 (0.37-0.56)                         |
| Autoimmune/cholestatic                    | 519          | 36     | 6.9 (5.0-9.6)                           | 0.75 (0.54-1.04)         | 0.83 (0.58-1.19)                         |
| <b>Hepatic encephalopathy<sup>c</sup></b> |              |        |                                         |                          |                                          |
| Alcohol                                   | 5,662        | 281    | 5.0 (4.4-5.6)                           | 1.04 (0.90-1.21)         | 1.12 (0.95-1.31)                         |
| Viral                                     | 8,790        | 423    | 4.8 (4.4-5.3)                           | Ref                      | Ref                                      |
| NASH/other                                | 3,085        | 62     | 2.0 (1.6-2.6)                           | 0.36 (0.28-0.48)         | 0.38 (0.28-0.50)                         |

|                                      |       |     |               |                  |                  |
|--------------------------------------|-------|-----|---------------|------------------|------------------|
| <b>Autoimmune/cholestatic</b>        | 545   | 20  | 3.7 (2.4-5.7) | 0.76 (0.49-1.18) | 0.80 (0.49-1.30) |
| <b>Variceal bleeding<sup>c</sup></b> |       |     |               |                  |                  |
| <b>Alcohol</b>                       | 5,766 | 126 | 2.2 (1.8-2.6) | 1.00 (0.80-1.25) | 1.17 (0.92-1.50) |
| <b>Viral</b>                         | 8,956 | 195 | 2.2 (1.9-2.5) | Ref              | Ref              |
| <b>NASH/other</b>                    | 3,111 | 17  | 0.5 (0.3-0.9) | 0.22 (0.13-0.36) | 0.28 (0.16-0.47) |
| <b>Autoimmune/cholestatic</b>        | 550   | 4   | 0.7 (0.3-1.9) | 0.33 (0.12-0.87) | 0.24 (0.06-0.97) |

<sup>a</sup>Per 100 person-years.

<sup>b</sup>Multivariable models were adjusted for sex, cause of cirrhosis, decompensation, Charlson comorbidity index, insurance, and year of cohort entry. For the mortality outcomes, hazard ratios (HR) are reported; for other outcomes, subhazard ratios (SHR) are reported.

<sup>c</sup>Decompensation outcomes were assessed in only those with compensated cirrhosis at baseline.

Abbreviations: NASH, nonalcoholic steatohepatitis; HR, hazard ratio; SHR, subhazard ratio; CI, confidence interval.



**eFigure 1. Mortality According to Age**

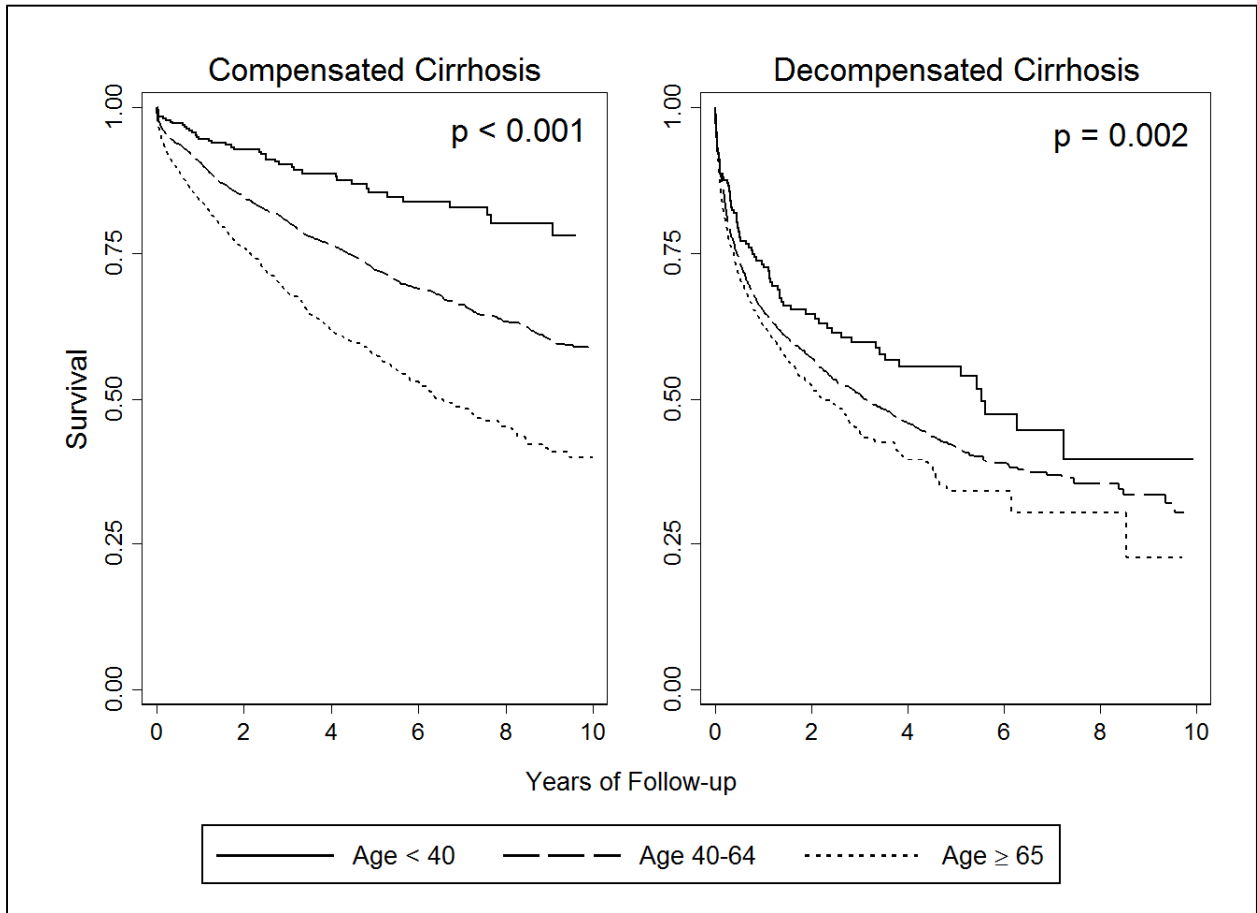

eFigure 2. Mortality According to Cause of Cirrhosis

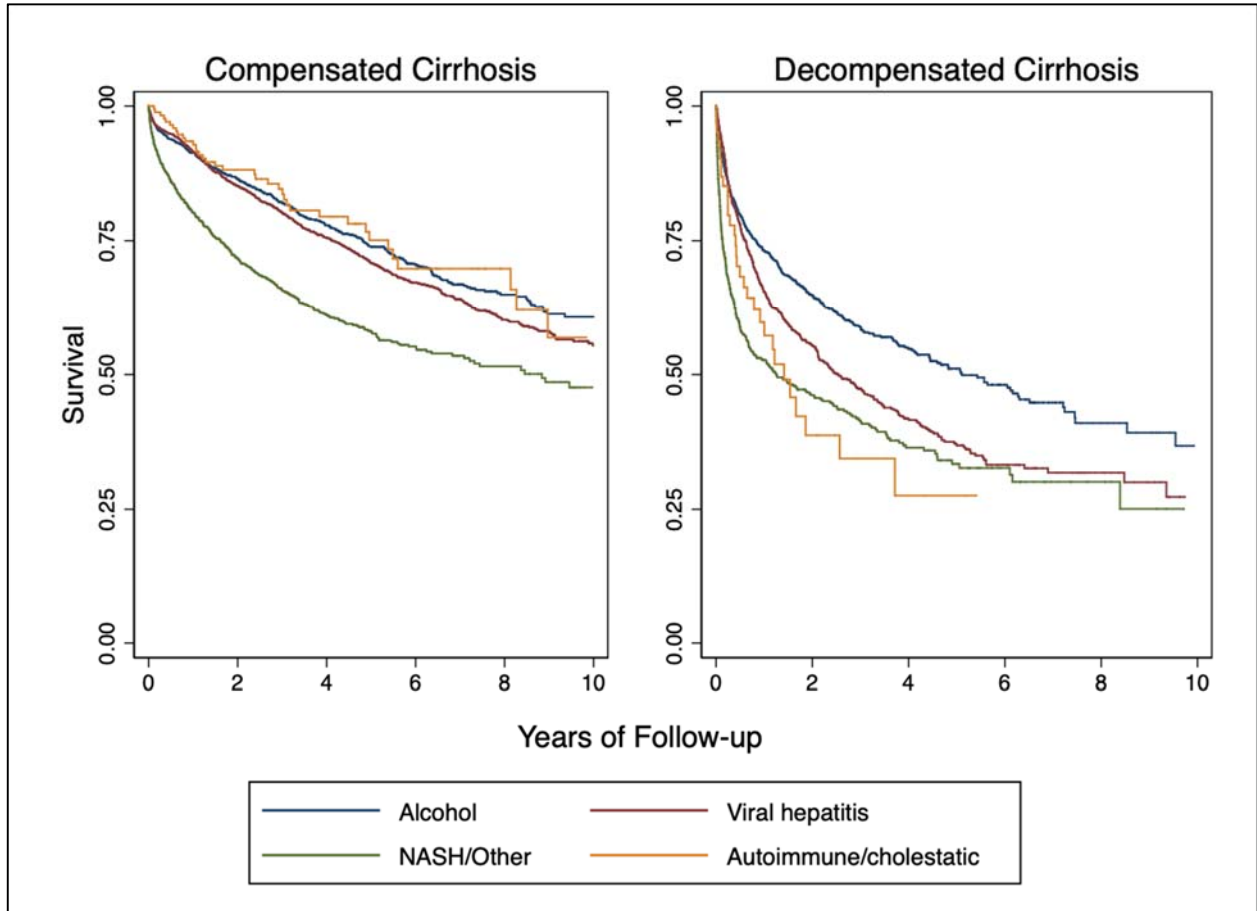

Supplement: jamanetwopen-2-e196412-s001.pdf [file jamanetwopen-2-e196412-s001.pdf]
